# Supplementary material
Source: PubMed Central journal article supplement (PMC7375377)
Supplement: JVI.00639-20-s0001.pdf [file JVI.00639-20-s0001.pdf]

1 **SUPPLEMENTARY INFORMATION**

2 **Supp. Table 1. All Putative SNPs.** 17dmiR-H1/H6 was subject to Illumina sequencing  
3 and mapped to the HSV-1 17*syn+* reference genome (GenBank NC\_001806.2) using  
4 SeqMan NGen using default alignment parameters (merSize=21, merSkip=0,  
5 merSkipQuery=4 minMatchPercent=93, matchScore=10, mismatchPenalty=20,  
6 gapPenalty=50, gapExtensionPenalty=5, minAlignedLength=35, maxGap=20,  
7 autoTrim=true, filterDeepLayout=false, alignmentCutoff=20, gap5Prime=true,  
8 forceFullForwardAlign=false, DelayalignInserts=true, removeUniqueInserts=True,  
9 filterDeepLayoutOrganelle=True, removeDuplicateSeqs=false,  
10 combineDuplicateSeqs=True). Out of 6.0M paired reads, template coverage was  
11 99.897% with median coverage of 6,797x. Variants were analyzed using SeqMan Ultra  
12 standard SNP filtering workflow (minDepth=5, minSnpFilter=25, pNotRef=90.0,  
13 pNotRefMinVal= 10.0). Variants were analyzed using SeqMan Ultra. The intended 25 bp  
14 deletion of mature miR-H1-5p/miR-H6-3p was observed at NC\_001806.2 nt 8,021-8,045  
15 and 118,329-118,353, representing the tRL and iRL segments respectively. 10 non-  
16 synonymous substitutions were observed but did not result in nonsense, no-start, no-stop,  
17 or frameshift mutations.



28 SAMtools and BCFtools, and visualization with Integrative Genomics Viewer. The in-  
29 house script is available from the authors upon request.

| Region | hsv1_non-redundant.fasta | REF    | ALT        | QUAL      | INFO    | CDS?                             | Gene                         |
|--------|--------------------------|--------|------------|-----------|---------|----------------------------------|------------------------------|
| RL     | 326                      | 327    | G          | C         | 225     | DP=262;VDB=4.70958e-21;SGB=-0.69 | LAT-3p-exon                  |
| RL     | 388                      | 389    | T          | C         | 225     | DP=253;VDB=1;SGB=-0.693147;MQ0F  | LAT-3p-exon                  |
| RL     | 1718                     | 1719   | C          | T         | 225     | DP=251;VDB=0.000233446;SGB=-0.65 | LAT-3p-exon                  |
| RL     | 2108                     | 2109   | G          | A         | 225     | DP=249;VDB=0.233736;SGB=-0.69314 | RL2-ICP0-Pro                 |
| RL     | 2729                     | 2730   | A          | G         | 225     | DP=249;VDB=0.913595;SGB=-0.69314 | RL2-ICP0 end                 |
| RL     | 3051                     | 3051   | TCCCCCCCC  | TCCCCCCCC | 38.8118 | INDEL;IDV=195;IMF=0.789474;DP=24 | RL2-intron                   |
| RL     | 5885                     | 5886   | G          | A         | 225     | DP=254;VDB=3.91748e-11;SGB=-0.69 | LAT-3p-exon                  |
| RL     | 6383                     | 6383   | GC         | GCC       | 228     | INDEL;IDV=236;IMF=0.951613;DP=24 | LAT-3p-exon                  |
| RL     | 6876                     | 6876   | TCCCCCCCC  | TCCCCCCCC | 50      | INDEL;IDV=223;IMF=0.899194;DP=24 | LAT-intron                   |
| RL     | 8019                     | 8044   | ACTTCCACTT | AC        | 228     | INDEL;IDV=199;IMF=0.904545;DP=22 | Deletion miR-H1-5p/miR-H6-3p |
| RL     | 8917                     | 8917   | GC         | GCC       | 215     | INDEL;IDV=178;IMF=0.903553;DP=19 | noncoding                    |
| RL     | 8953                     | 8954   | A          | G         | 225     | DP=155;VDB=3.02391e-14;SGB=-0.69 | noncoding                    |
| UL     | 870                      | 870    | CGG        | CGGG      | 65      | INDEL;IDV=206;IMF=0.827309;DP=24 | LAT-3p-exon/RL1-ICP34.5      |
| UL     | 894                      | 895    | TGG        | TG        | 64      | INDEL;IDV=239;IMF=0.959839;DP=24 | LAT-3p-exon/RL1-ICP34.5      |
| UL     | 1441                     | 1442   | T          | C         | 225     | DP=250;VDB=0.786984;SGB=-0.69314 | LAT-3p-exon/RL1-ICP34.5      |
| UL     | 4175                     | 4176   | C          | T         | 225     | DP=248;VDB=0.453272;SGB=-0.69314 | RL2-ICP0                     |
| UL     | 6014                     | 6015   | G          | C         | 225     | DP=299;VDB=0.00494872;SGB=-0.693 | LAT-intron                   |
| UL     | 7003                     | 7004   | T          | G         | 225     | DP=246;VDB=0.0589149;SGB=-0.693  | LAT-5p-exon                  |
| UL     | 8522                     | 8523   | T          | C         | 225     | DP=248;VDB=0.804797;SGB=-0.69314 | LAT-pro                      |
| UL     | 9634                     | 9635   | C          | G         | 228     | DP=235;VDB=0.0671508;SGB=-0.693  | UL1                          |
| UL     | 9636                     | 9637   | G          | C         | 228     | DP=248;VDB=0.073501;SGB=-0.69314 | UL1                          |
| UL     | 13207                    | 13208  | C          | G         | 225     | DP=248;VDB=0.893342;SGB=-0.69314 | UL5                          |
| UL     | 17501                    | 17502  | T          | C         | 225     | DP=246;VDB=0.997217;SGB=-0.69314 | UL6/UL7                      |
| UL     | 24223                    | 24224  | ACC        | AC        | 42.8416 | INDEL;IDV=233;IMF=0.954918;DP=24 | UL10                         |
| UL     | 28023                    | 28024  | G          | C         | 225     | DP=249;VDB=0.154631;SGB=-0.69314 | UL13/UL14                    |
| UL     | 37621                    | 37622  | A          | G         | 225     | DP=249;VDB=0.987264;SGB=-0.69314 | UL19/UL20                    |
| UL     | 38488                    | 38489  | T          | C         | 225     | DP=245;VDB=0.999935;SGB=-0.69314 | UL19/UL20                    |
| UL     | 39238                    | 39239  | A          | G         | 225     | DP=253;VDB=0.134424;SGB=-0.69314 | UL19/UL20                    |
| UL     | 41382                    | 41383  | A          | G         | 225     | DP=250;VDB=0.999992;SGB=-0.69314 | UL20                         |
| UL     | 42968                    | 42969  | C          | G         | 225     | DP=201;VDB=1;SGB=-0.693147;MQS1  | UL21                         |
| UL     | 46364                    | 46365  | C          | T         | 225     | DP=249;VDB=0.0860666;SGB=-0.693  | UL22                         |
| UL     | 51417                    | 51418  | G          | C         | 225     | DP=249;VDB=0.9609;SGB=-0.693147  | UL24/UL25/UL26               |
| UL     | 51925                    | 51926  | C          | G         | 225     | DP=250;VDB=0.135203;SGB=-0.69314 | UL24/UL25/UL26               |
| UL     | 52169                    | 52170  | T          | A         | 225     | DP=248;VDB=0.999331;SGB=-0.69314 | UL24/UL25/UL26               |
| UL     | 53025                    | 53026  | TC         | T         | 228     | INDEL;IDV=243;IMF=0.979839;DP=24 | noncoding                    |
| UL     | 53148                    | 53149  | C          | T         | 225     | DP=248;VDB=0.276728;SGB=-0.69314 | UL27/UL28                    |
| UL     | 54424                    | 54425  | T          | C         | 225     | DP=251;VDB=0.748163;SGB=-0.69314 | UL27/UL28                    |
| UL     | 54581                    | 54582  | G          | C         | 228     | DP=239;VDB=0.844419;SGB=-0.69314 | UL27/UL28                    |
| UL     | 54582                    | 54583  | C          | G         | 228     | DP=247;VDB=0.847415;SGB=-0.69314 | UL27/UL28                    |
| UL     | 59326                    | 59327  | G          | A         | 225     | DP=248;VDB=0.350443;SGB=-0.69314 | UL29                         |
| UL     | 60272                    | 60273  | G          | C         | 228     | DP=237;VDB=0.77495;SGB=-0.69314  | UL29                         |
| UL     | 60273                    | 60274  | C          | G         | 225     | DP=240;VDB=0.746647;SGB=-0.69314 | UL30                         |
| UL     | 62293                    | 62294  | C          | T         | 225     | DP=249;VDB=0.1031;SGB=-0.693147  | noncoding                    |
| UL     | 63732                    | 63733  | T          | C         | 225     | DP=249;VDB=0.971302;SGB=-0.69314 | UL30                         |
| UL     | 66518                    | 66519  | G          | C         | 225     | DP=236;VDB=0.321851;SGB=-0.69314 | UL30-3p-UTR                  |
| UL     | 66519                    | 66520  | C          | G         | 225     | DP=249;VDB=0.34031;SGB=-0.69314  | UL30-3p-UTR                  |
| UL     | 67070                    | 67071  | G          | A         | 225     | DP=246;VDB=0.448281;SGB=-0.69314 | UL31/UL32                    |
| UL     | 74626                    | 74627  | G          | T         | 225     | DP=242;VDB=0.0040682;SGB=-0.693  | UL36                         |
| UL     | 74627                    | 74628  | T          | G         | 228     | DP=248;VDB=0.002607;SGB=-0.69314 | UL36                         |
| UL     | 77439                    | 77440  | A          | G         | 225     | DP=252;VDB=0.145247;SGB=-0.69314 | UL36                         |
| UL     | 80762                    | 80763  | A          | G         | 225     | DP=251;VDB=0.744222;SGB=-0.69314 | UL37                         |
| UL     | 82271                    | 82272  | G          | C         | 225     | DP=242;VDB=0.0991114;SGB=-0.693  | UL37                         |
| UL     | 82272                    | 82273  | G          | T         | 225     | DP=247;VDB=0.104794;SGB=-0.69314 | UL37                         |
| UL     | 82510                    | 82511  | C          | T         | 225     | DP=247;VDB=0.988231;SGB=-0.69314 | UL37                         |
| UL     | 83110                    | 83111  | C          | T         | 225     | DP=250;VDB=0.446547;SGB=-0.69314 | UL37                         |
| UL     | 85545                    | 85545  | G          | GC        | 228     | INDEL;IDV=231;IMF=0.935223;DP=24 | UL38                         |
| UL     | 85969                    | 85970  | A          | G         | 225     | DP=248;VDB=0.000957015;SGB=-0.65 | UL38-3p-UTR                  |
| UL     | 86540                    | 86541  | C          | G         | 225     | DP=248;VDB=0.711011;SGB=-0.69314 | UL38                         |
| UL     | 87038                    | 87038  | A          | AG        | 228     | INDEL;IDV=241;IMF=0.975708;DP=24 | UL39                         |
| UL     | 88243                    | 88244  | C          | G         | 228     | DP=237;VDB=0.0414028;SGB=-0.693  | UL39                         |
| UL     | 88244                    | 88245  | A          | C         | 228     | DP=236;VDB=0.0546475;SGB=-0.693  | UL39                         |
| UL     | 88245                    | 88246  | T          | A         | 228     | DP=245;VDB=0.0467195;SGB=-0.693  | UL39                         |
| UL     | 91403                    | 91404  | G          | A         | 225     | DP=249;VDB=0.626168;SGB=-0.69314 | UL41                         |
| UL     | 92105                    | 92106  | G          | A         | 225     | DP=250;VDB=0.00479286;SGB=-0.693 | UL41                         |
| UL     | 98418                    | 98419  | G          | A         | 225     | DP=250;VDB=0.981837;SGB=-0.69314 | UL44/UL45                    |
| UL     | 98897                    | 98898  | T          | C         | 225     | DP=249;VDB=0.999111;SGB=-0.69314 | UL46/UL47                    |
| UL     | 99525                    | 99526  | A          | G         | 225     | DP=247;VDB=0.934893;SGB=-0.69314 | UL46/UL47                    |
| UL     | 105667                   | 105668 | A          | G         | 225     | DP=248;VDB=0.0016253;SGB=-0.693  | UL49/UL49A                   |
| UL     | 106708                   | 106709 | C          | A         | 228     | DP=256;VDB=0.0269378;SGB=-0.693  | UL49A-3p-UTR                 |
| RS     | 599                      | 600    | GCCCCC     | GCCCC     | 114     | INDEL;IDV=210;IMF=0.905172;DP=23 | LAT/RL1-ICP4                 |
| RS     | 621                      | 622    | A          | G         | 180     | DP=203;VDB=1.0954e-24;SGB=-0.693 | LAT/RL1-ICP4                 |
| RS     | 1646                     | 1647   | G          | C         | 225     | DP=244;VDB=2.21441e-08;SGB=-0.69 | LAT                          |
| RS     | 1647                     | 1648   | C          | G         | 225     | DP=247;VDB=2.30915e-08;SGB=-0.69 | LAT                          |
| RS     | 2206                     | 2207   | A          | G         | 225     | DP=250;VDB=0.897867;SGB=-0.69314 | RL2-ICP0                     |
| RS     | 2757                     | 2758   | C          | G         | 225     | DP=23;VDB=0.648266;SGB=-0.69256  | RL2-ICP0-intron              |
| RS     | 2758                     | 2759   | G          | C         | 225     | DP=23;VDB=0.649307;SGB=-0.69256  | RL2-ICP0-intron              |
| RS     | 4263                     | 4264   | T          | C         | 225     | DP=253;VDB=1.68513e-23;SGB=-0.69 | RL2-ICP0                     |
| US     | 5886                     | 5887   | A          | G         | 228     | DP=250;VDB=0.25838;SGB=-0.69314  | LAT                          |
| US     | 7955                     | 7956   | C          | T         | 225     | DP=259;VDB=0.127325;SGB=-0.69314 | LAT-Pro                      |
| US     | 10828                    | 10829  | G          | A         | 225     | DP=249;VDB=0.419129;SGB=-0.69314 | UL1/UL2                      |

31

32

A

### tRL miR-H1/H6 Sequence

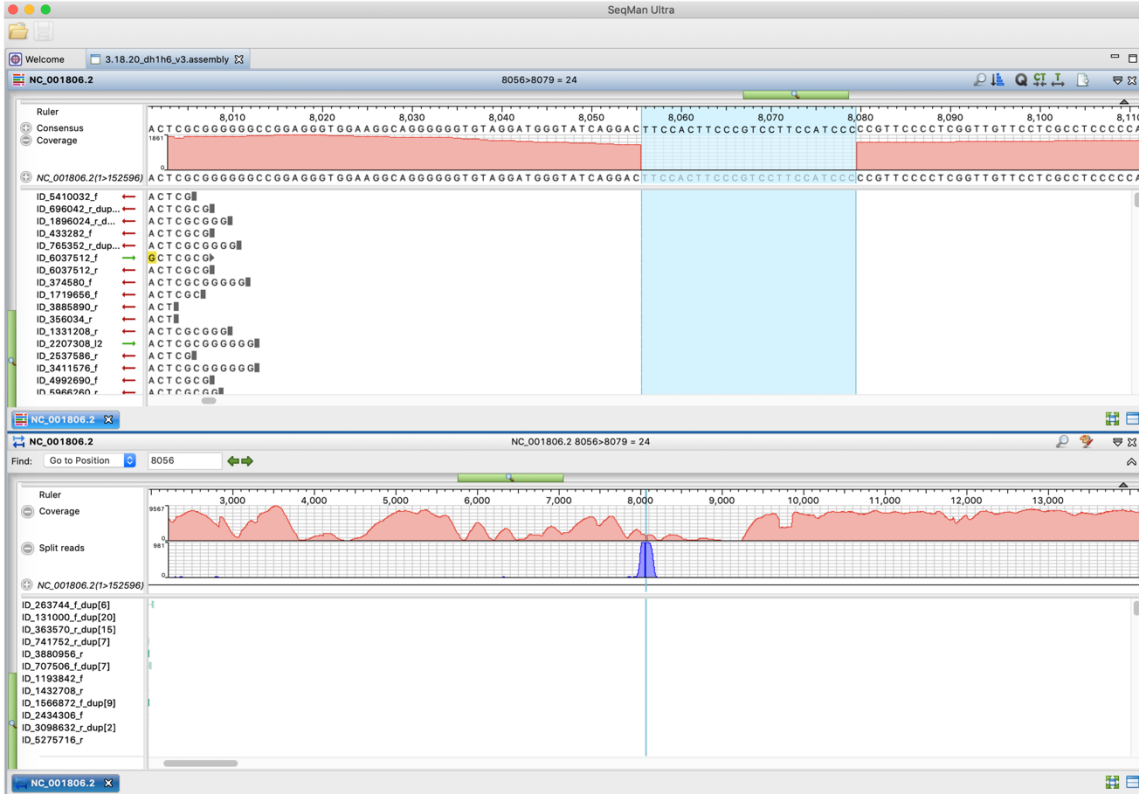

33

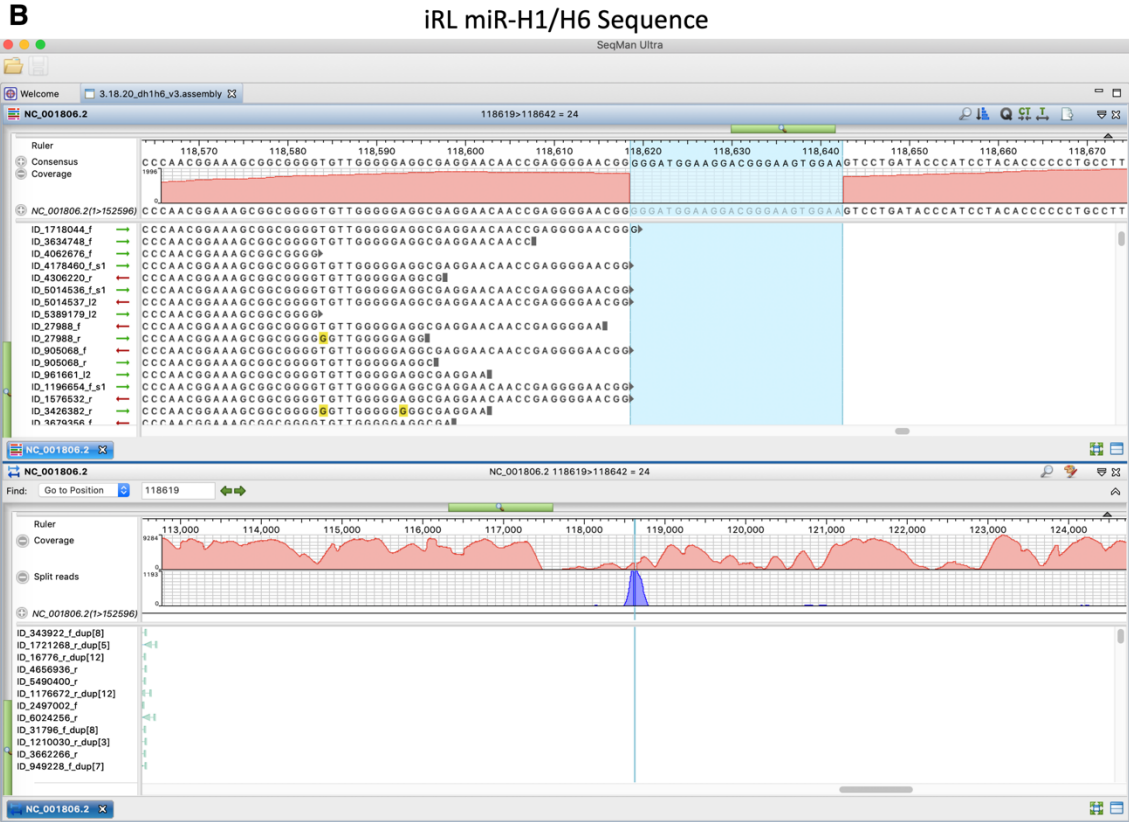

34

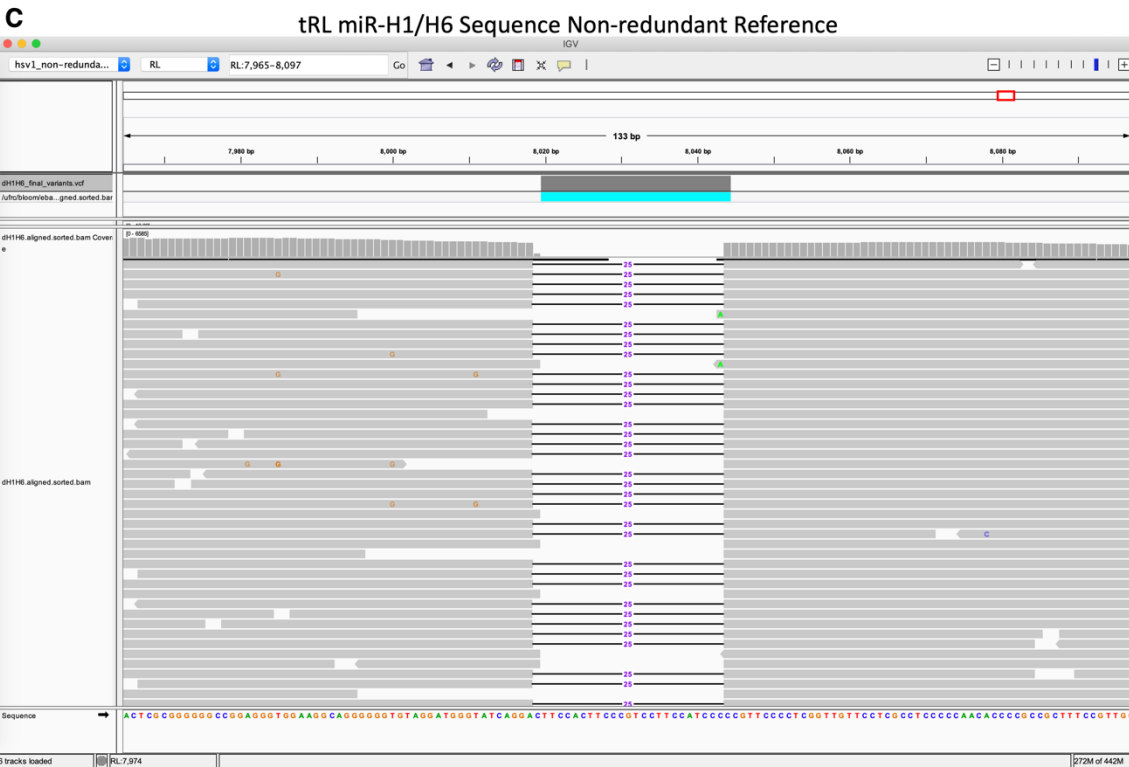

35

36 **Supp. Figure 1. Confirmation of miR-H1/H6 Deletion.** 17dmiR-H1/H6 was subject to  
37 Illumina sequencing and (A-B) mapped to the HSV-1 17<sub>syn+</sub> reference genome  
38 (GenBank NC\_001806.2) using SeqMan NGen. Variants were analyzed using SeqMan  
39 Ultra. The intended 25 bp deletion of mature miR-H1-5p/miR-H6-3p was observed at  
40 NC\_001806.2 nt 8,021-8,045 and 118,329-118,353, representing the(A) tRL and (B) iRL  
41 segments respectively. C) The 25 bp deletion was also confirmed using a standard SNP  
42 analysis workflow using BWA to aligning to a non-redundant HSV-1 genome where  
43 there only one copy of the repeat regions was retained(1) followed by variant calling with  
44 SAMtools and BCFtools, and visualization with Integrative Genomics Viewer.

45

46 Supplementary References.

- 47 1. Morse AM, Calabro KR, Fear JM, Bloom DC, McIntyre LM. 2017. Reliable  
48 Detection of Herpes Simplex Virus Sequence Variation by High-Throughput  
49 Resequencing. *Viruses* 9:226.

50
